# Supplementary material for: Monitoring Intracellular Redox Changes in Ozone-Exposed Airway Epithelial Cells
Source: PubMed Central journal article supplement (PMC3621206; doi:10.1289/ehp.1206039), 2012-12-18
Supplement: ehp.1206039.s001.pdf [file ehp.1206039.s001.pdf]

## Supplemental Material

Monitoring Intracellular Redox Changes in Ozone-Exposed Airway Epithelial Cells

Eugene A. Gibbs-Flournoy, Steven O. Simmons, Philip A. Bromberg, Tobias P. Dick,  
and James M. Samet

### **Table of Contents:**

|                                                                                                   |              |
|---------------------------------------------------------------------------------------------------|--------------|
| <b>Figure S1. Stage-top ozone exposure system .....</b>                                           | <b>Pg. 2</b> |
| <b>Figure S2. Determination of NADPH levels .....</b>                                             | <b>Pg. 3</b> |
| <b>Figure S3. Determination of intracellular glutathione .....</b>                                | <b>Pg. 4</b> |
| <b>Figure S4. Selenium-induced GPx1 overexpression .....</b>                                      | <b>Pg. 5</b> |
| <b>Figure S5. Dose- and time-dependent increase in <math>E_{GSH}</math> with cell images.....</b> | <b>Pg. 6</b> |

## Supplemental Figure S1

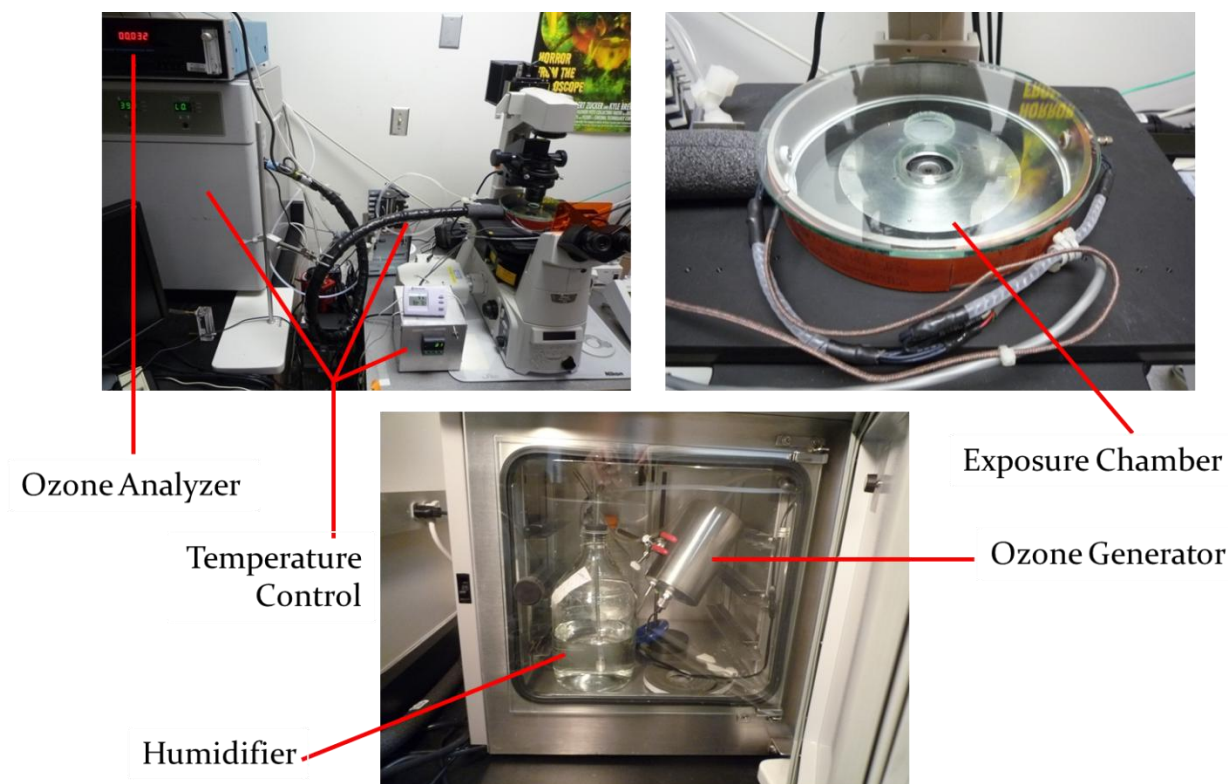

**Figure S1. Stage-top ozone exposure system.** Displayed are components of the stage-top ozone ( $O_3$ ) exposure system used for all real-time assessments of living cells undergoing  $O_3$  exposure. 5%  $CO_2$ /Balance Air entering the system is first humidified by bubbling it through autoclaved  $dH_2O$  housed in a  $37^\circ C$  incubator. The gas is then passed through an  $O_3$  generator where  $O_3$  is created by using a UV pen lamp. Concentrations of  $O_3$  are controlled by a voltage regulator which adjusts lamp intensity. The newly generated  $O_3$  then flows to a temperature-controlled, stage-top exposure chamber via a heated line. All gas entering the exposure chamber is sampled by a Dasibi ozone analyzer at a T-fitting placed at the end of the heated line, just before the entrance to the chamber. The humidity of gas diverted to the  $O_3$  analyzer is removed using a Perma Pure gas drier. All heated components are maintained at or above  $37^\circ C$  to maintain  $\geq 90\%$  humidity of the flowing gas.

## Supplemental Figure S2

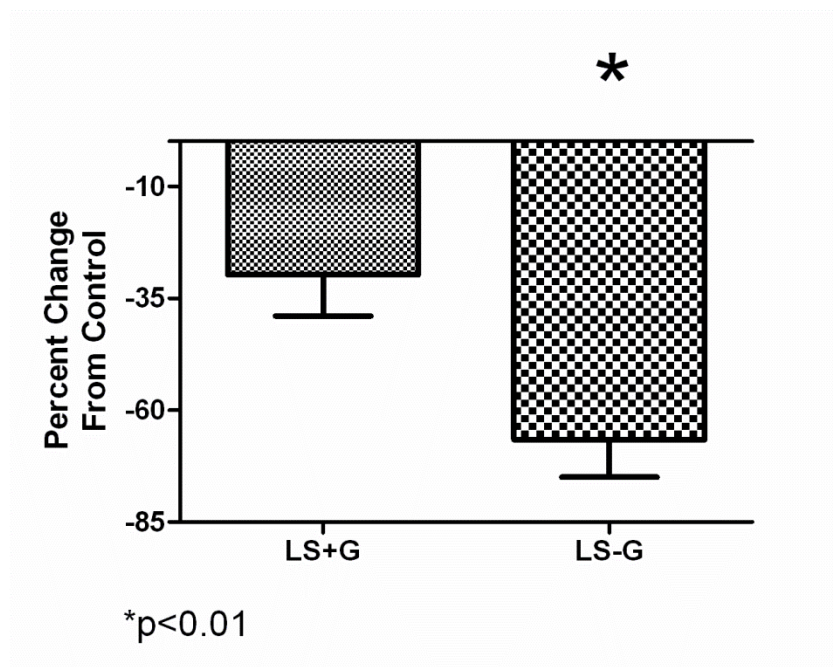

**Figure S2. Determination of NADPH levels.** The effect of glucose deprivation on NADPH was assessed following a 2 hr equilibration in either Locke Solution with glucose (LS+G) or Locke Solution without glucose (LS-G), and expressed as percent change from the mean NADPH concentration measured from cells maintained in growth media (KGM). \* $p < 0.01$ ,  $n \geq 3$  or more experiments.

## Supplemental Figure S3

A

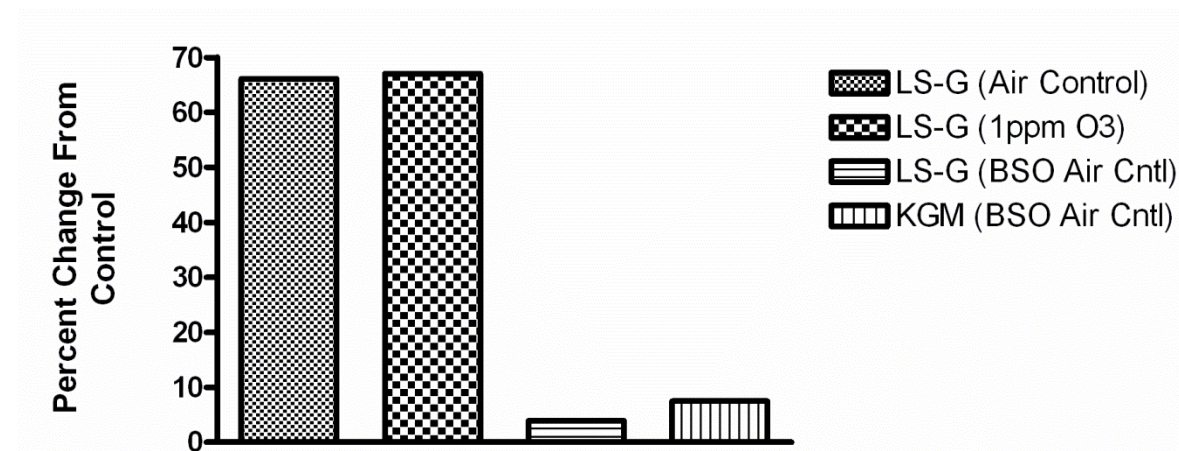

B

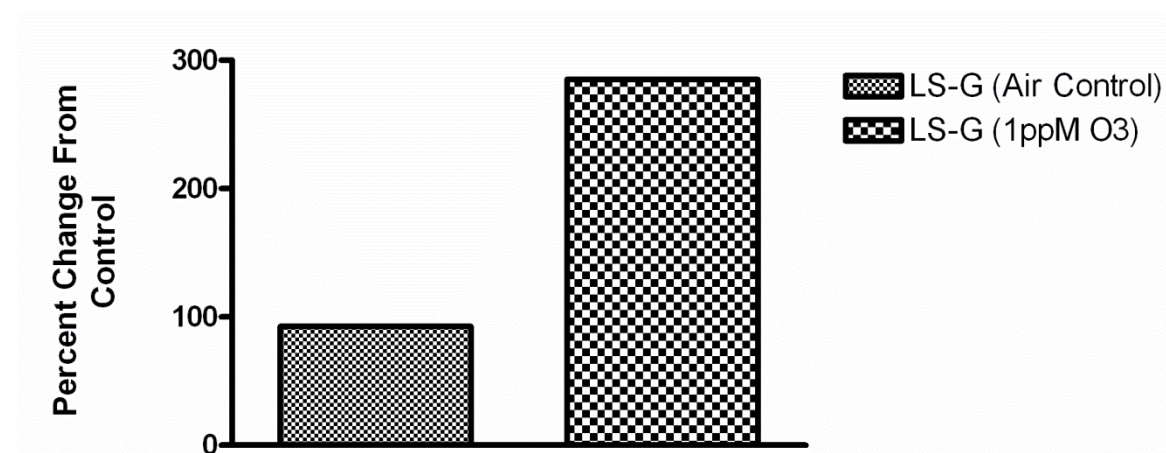

**Figure S3. Determination of intracellular glutathione.** **A)** The total glutathione content (GSH + GSSG) of cells exposed to either 0 (air control) or 1 ppm O<sub>3</sub> in Locke solution without glucose (LS-G) for 50 min. To ensure the total glutathione content could be modulated, cells were exposed to an air control in either LS-G or growth medium (KGM) following pretreatment with buthionine sulfoximine (BSO), a gamma-glutamylcysteine synthetase inhibitor used to decrease glutathione levels. The responses are plotted as percent change from the KGM air control. **B)** The oxidized glutathione content (GSSG) of cells exposed either 0 (air control) or 1 ppm O<sub>3</sub> for 50 min in LS-G. Cells exposed to 0 ppm O<sub>3</sub> in growth media (KGM) serve as the control, and responses are plotted as percent change from the control.

## Supplemental Figure S4

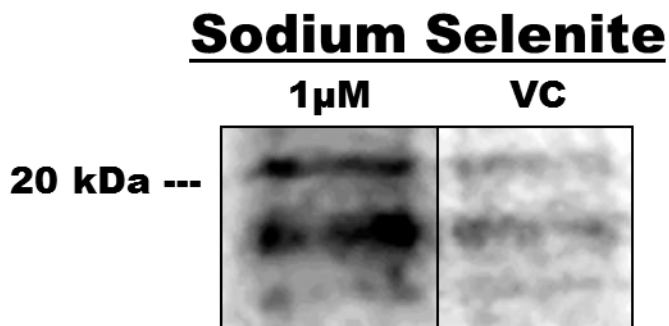

**Figure S4. Selenium-induced GPx1 overexpression.** Detection of GPx1 expression following a 48 hr pretreatment with either 0 (vehicle control, VC) or 1  $\mu$ M sodium selenite; cell lysates were separated by SDS-PAGE and immunoblotted with anti-GPx1. The expected size of GPx1 is approximately 22 kDa.

## Supplemental Figure S5

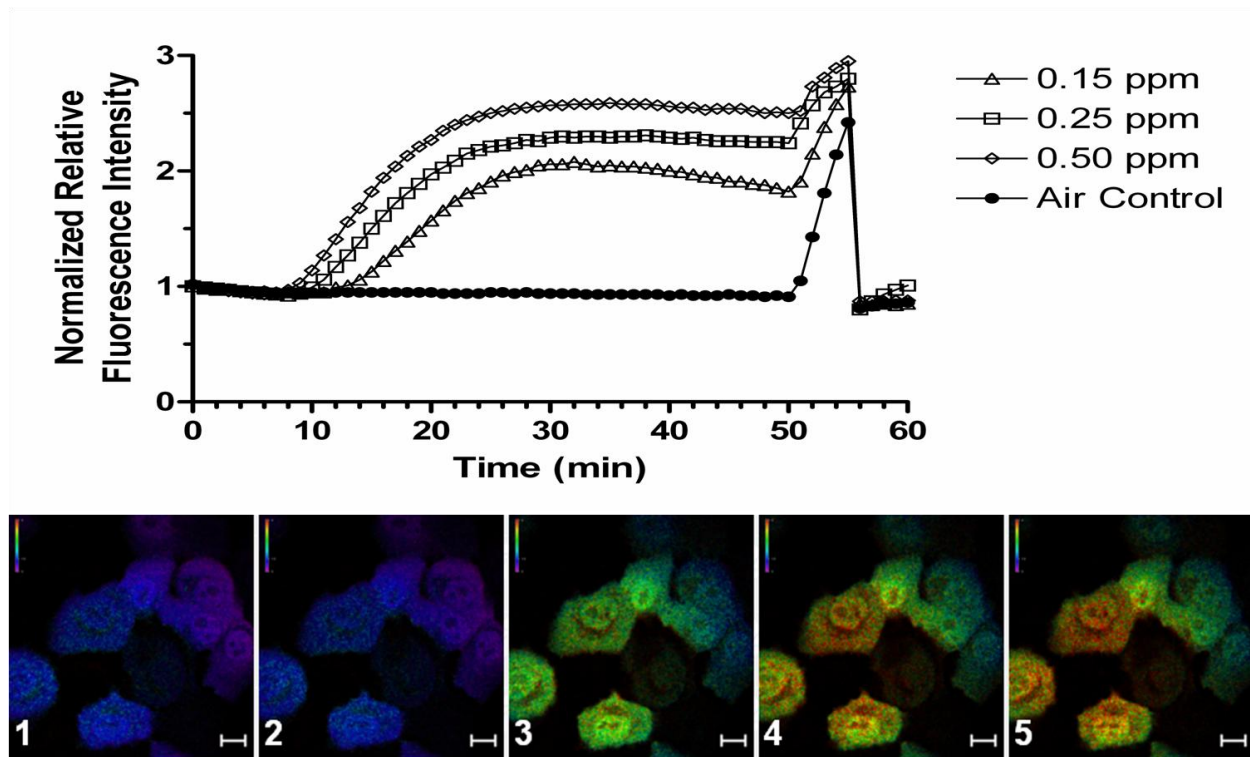

**Figure S5. Exposure to O<sub>3</sub> induces a dose- and time-dependent increase in the cytosolic glutathione redox potential in airway epithelial cells.** BEAS-2B cells expressing cytosolic roGFP2 were exposed to clean air for 5 min followed by a 0 (Air Control), 0.15, 0.25 or 0.50 ppm O<sub>3</sub> exposure for 35 min in a stage-top exposure system maintained at 37 °C, >90% relative humidity, and 5% CO<sub>2</sub>. Shown are the ratiometric values (404/488) calculated from the fluorescence intensity emitted at 510 nm induced by sequential excitation at 404 and 488 nm, and plotted relative to the 5 min baseline. Addition of 0.1 mM H<sub>2</sub>O<sub>2</sub> at the end of the O<sub>3</sub> exposure produced a maximal response which was fully reversible with the addition of 10 mM DTT. The pseudo-colored images displayed below the plotted data represent ratiometric changes in fluorescence of cells being exposed to 0.5 ppm O<sub>3</sub>. Increases in the ratiometric fluorescence intensity are represented by changes in color from Violet/Blue to Red as indicated by the scale bar in the upper left hand corner. Each panel was taken in series at 10 min intervals starting at T=0 min for panel 1 and ending with T=40 min for panel 5. The scale bar in the bottom right corner of each panel is 10 μm in length. The data shown were derived from 3 or more separate experiments monitoring 7 or more cells in real-time throughout the exposure period.
